# Supplementary material for: Addressing MISEV guidance using targeted LC‐MS/MS: A method for the detection and quantification of extracellular vesicle‐enriched and contaminant protein markers from blood
Source: PubMed Central journal article supplement (PMC11080780; doi:10.1002/jex2.56), 2022-09-05
Supplement: JEX2-1-e56-s001.pdf [file JEX2-1-e56-s001.pdf]

## Supporting Information

### **Addressing MISEV Guidance Using Targeted LC-MS/MS: A Method for the Detection and Quantification of Extracellular Vesicle-Enriched and Contaminant Protein Markers from Blood**

Lauren A. Newman<sup>1</sup>, Zivile Useckaite<sup>1</sup>, and Andrew Rowland<sup>1</sup>

<sup>1</sup> College of Medicine and Public Health, Flinders University, Adelaide, South Australia  
Corresponding author email: [andrew.rowland@flinders.edu.au](mailto:andrew.rowland@flinders.edu.au)

### qEV35

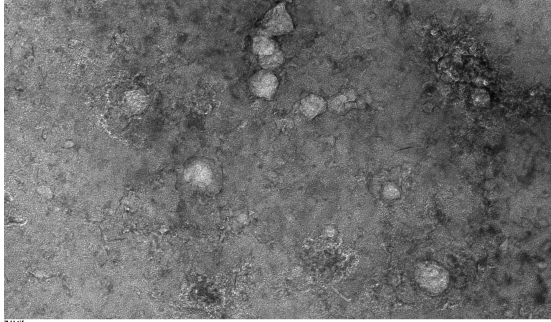

Z.U.HJ  
Cal: 0.219644 nm/pix

100 nm  
Direct Mag: 49000 x  
Adelaide Microscopy

Camera: MANOSPR115, Exposure: 1200 (ms) x 1 std. frames, Gain: 1, Bin: 1  
Gamma: 1.00, No Sharpening, Normal Contrast

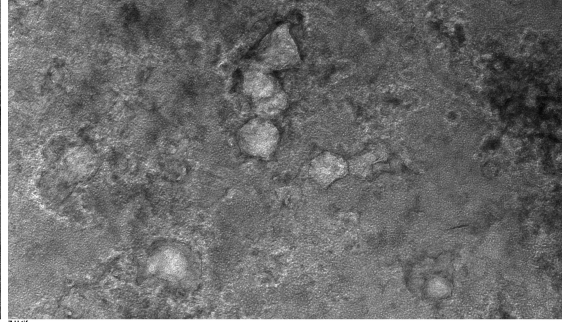

Z.U.HJ  
Cal: 0.168273 nm/pix

100 nm  
Direct Mag: 68000 x  
Adelaide Microscopy

Camera: MANOSPR115, Exposure: 1200 (ms) x 1 std. frames, Gain: 1, Bin: 1  
Gamma: 1.00, No Sharpening, Normal Contrast

### qEV70

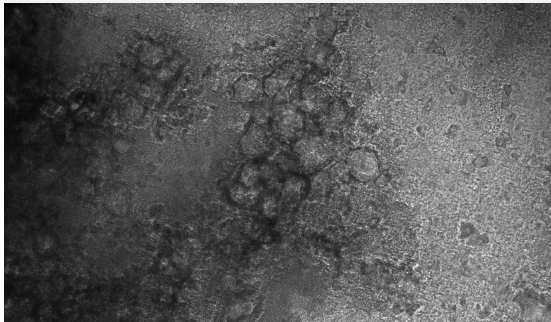

Z.U.HJ  
Cal: 0.219644 nm/pix

100 nm  
Direct Mag: 49000 x  
Adelaide Microscopy

Camera: MANOSPR115, Exposure: 1200 (ms) x 1 std. frames, Gain: 1, Bin: 1  
Gamma: 1.00, No Sharpening, Normal Contrast

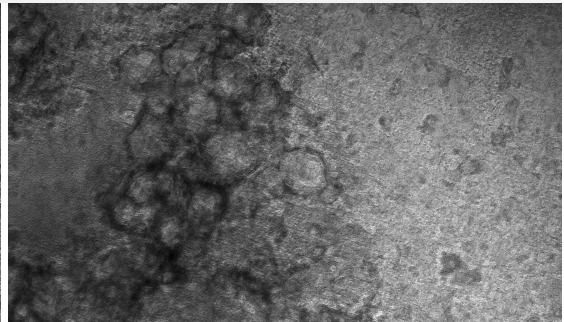

Z.U.HJ  
Cal: 0.168273 nm/pix

100 nm  
Direct Mag: 68000 x  
Adelaide Microscopy

Camera: MANOSPR115, Exposure: 1200 (ms) x 1 std. frames, Gain: 1, Bin: 1  
Gamma: 1.00, No Sharpening, Normal Contrast

### ExoQuick

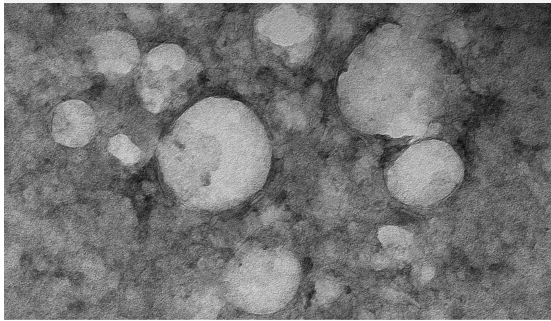

Z.U.HJ  
Cal: 0.219644 nm/pix

100 nm  
Direct Mag: 49000 x  
Adelaide Microscopy

Camera: MANOSPR115, Exposure: 1200 (ms) x 1 std. frames, Gain: 1, Bin: 1  
Gamma: 1.00, No Sharpening, Normal Contrast

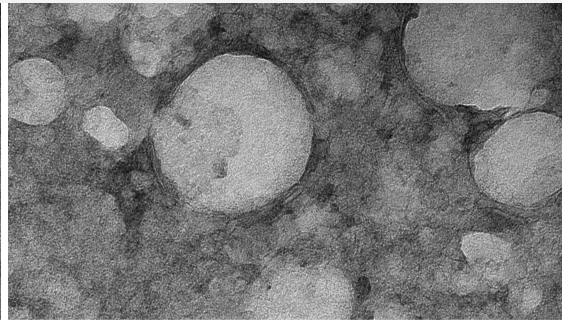

Z.U.HJ  
Cal: 0.168273 nm/pix

100 nm  
Direct Mag: 68000 x  
Adelaide Microscopy

Camera: MANOSPR115, Exposure: 1200 (ms) x 1 std. frames, Gain: 1, Bin: 1  
Gamma: 1.00, No Sharpening, Normal Contrast

**Figure S1.** Unedited TEM images at 49,000 x magnification (left panels) and 68,000 x magnification (right panels).



**A** Gel 1: P1, P2

Protein activation, pre-transfer

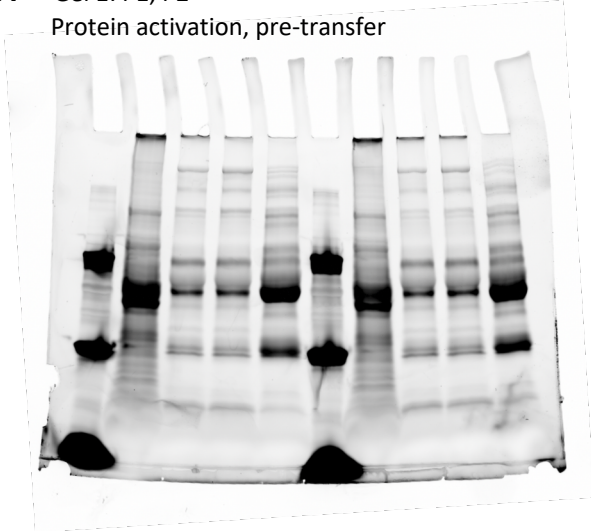

**B** Gel 2: P3, P4

Protein activation, pre-transfer

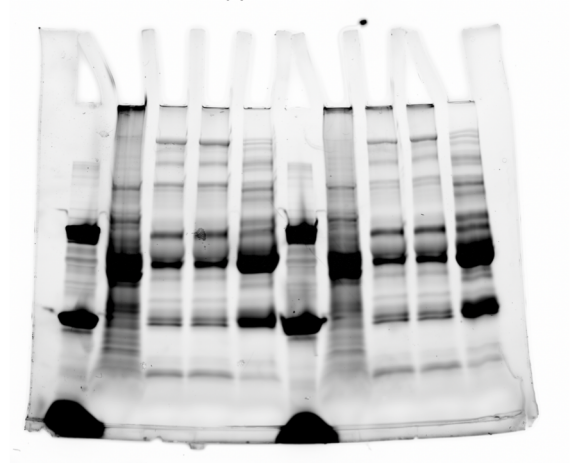

**C** Blot 1: P1, P2

Protein transferred to PVDF membrane

1 2 3 4 5 1 2 3 4 5

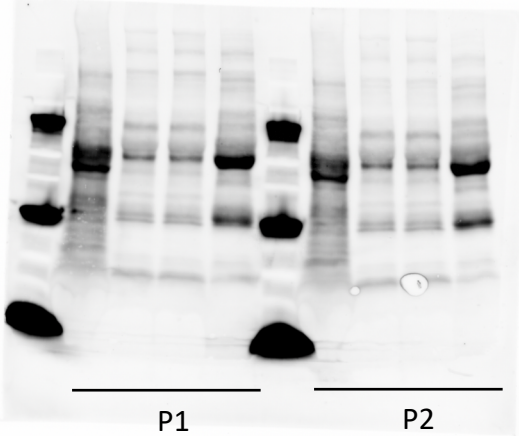

**D** Blot 1: P3, P4

Protein transferred to PVDF membrane

1 2 3 4 5 1 2 3 4 5

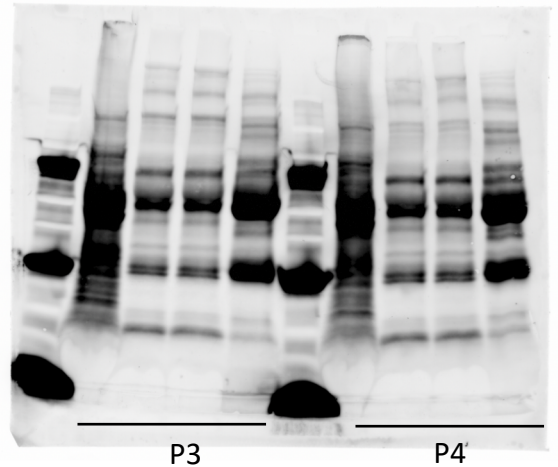

Lane 1= MW marker, Lane 2=HLM, Lane 3=qEV35, Lane 4=qEV70, Lane5=ExoQuick

**E** Gel 1: P1, P2

Post-transfer, 7min mixed MW

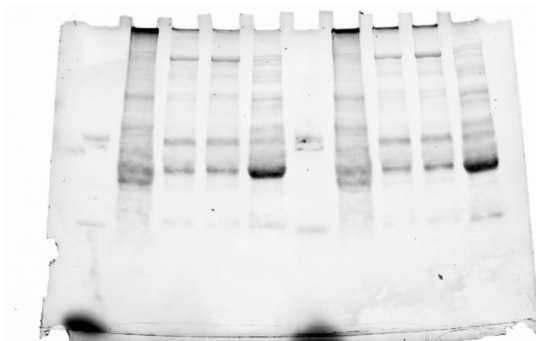

**F** Gel 2: P3, P4

Post-transfer, 7min mixed MW

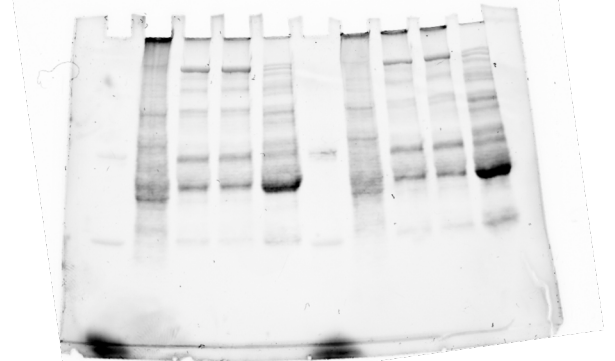

**Figure S2.** Full images of immunoblot gels showing total protein activation pre-transfer (**A-B**) and post-transfer (**E-F**) onto PVDF membranes (**C-D**). No stain, 35 $\mu$ g of lysed HLM or EV protein loaded to each well.

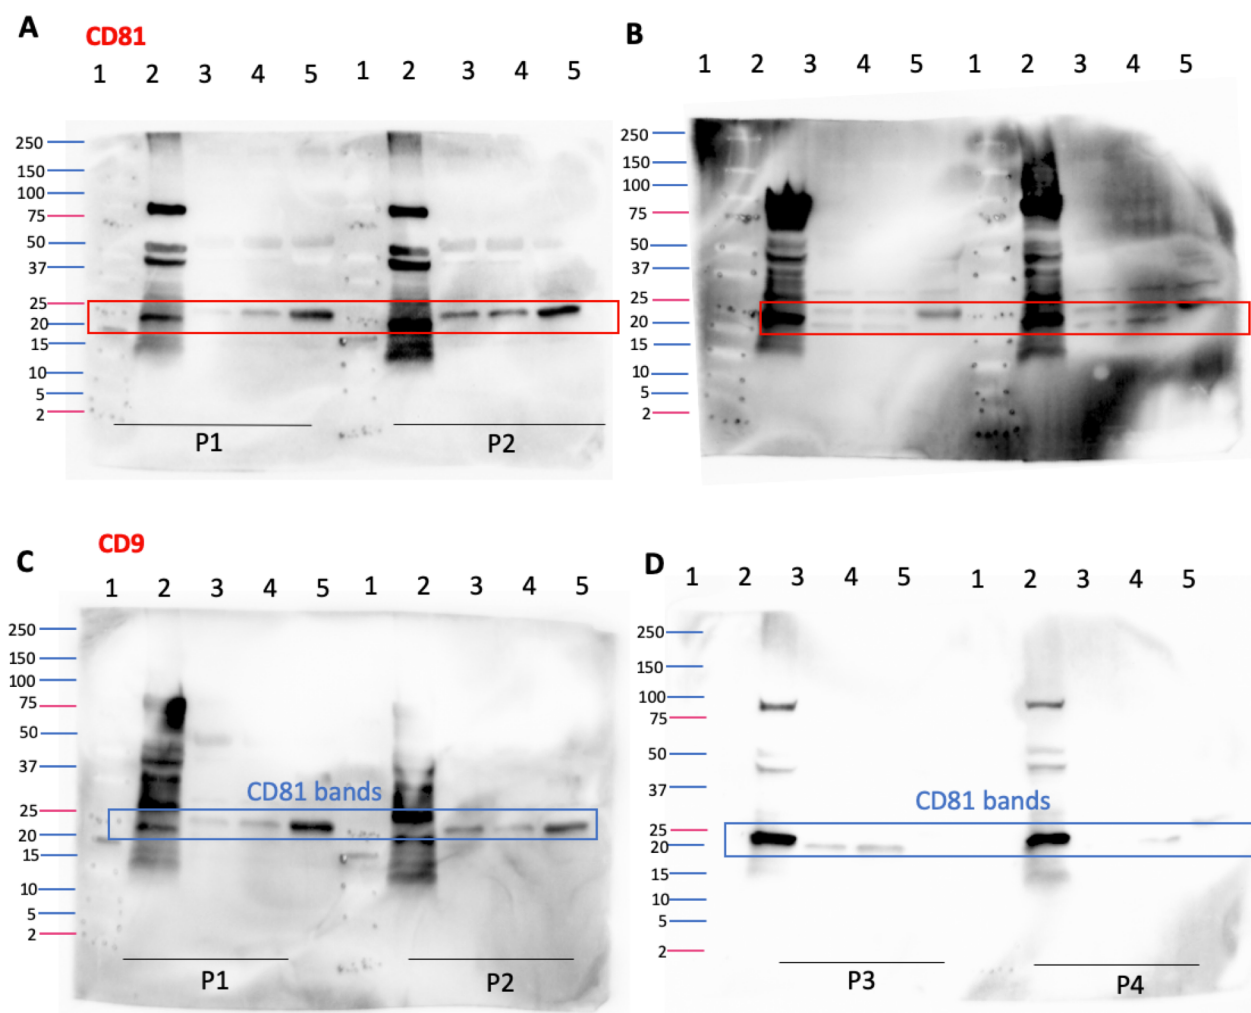

**Figure S3.** Full images of immunoblots the expression of EV-associated tetraspanins: CD81 (**A-B**) and CD9 (**C-D**) on PVDF. No CD9 band observed, unsuccessful stripping of CD81 antibody. Auto-exposure, 35 $\mu$ g of lysed HLM or EV protein loaded to each well. Lane 1= MW marker, Lane 2=HLM, Lane 3=qEV35, Lane 4=qEV70, Lane 5=ExoQuick

CD81 predicted band 25kDa, observed band 22kDa

CD9 predicted band 25kDa, reported 22kDa on manufacturers website. Not observed.

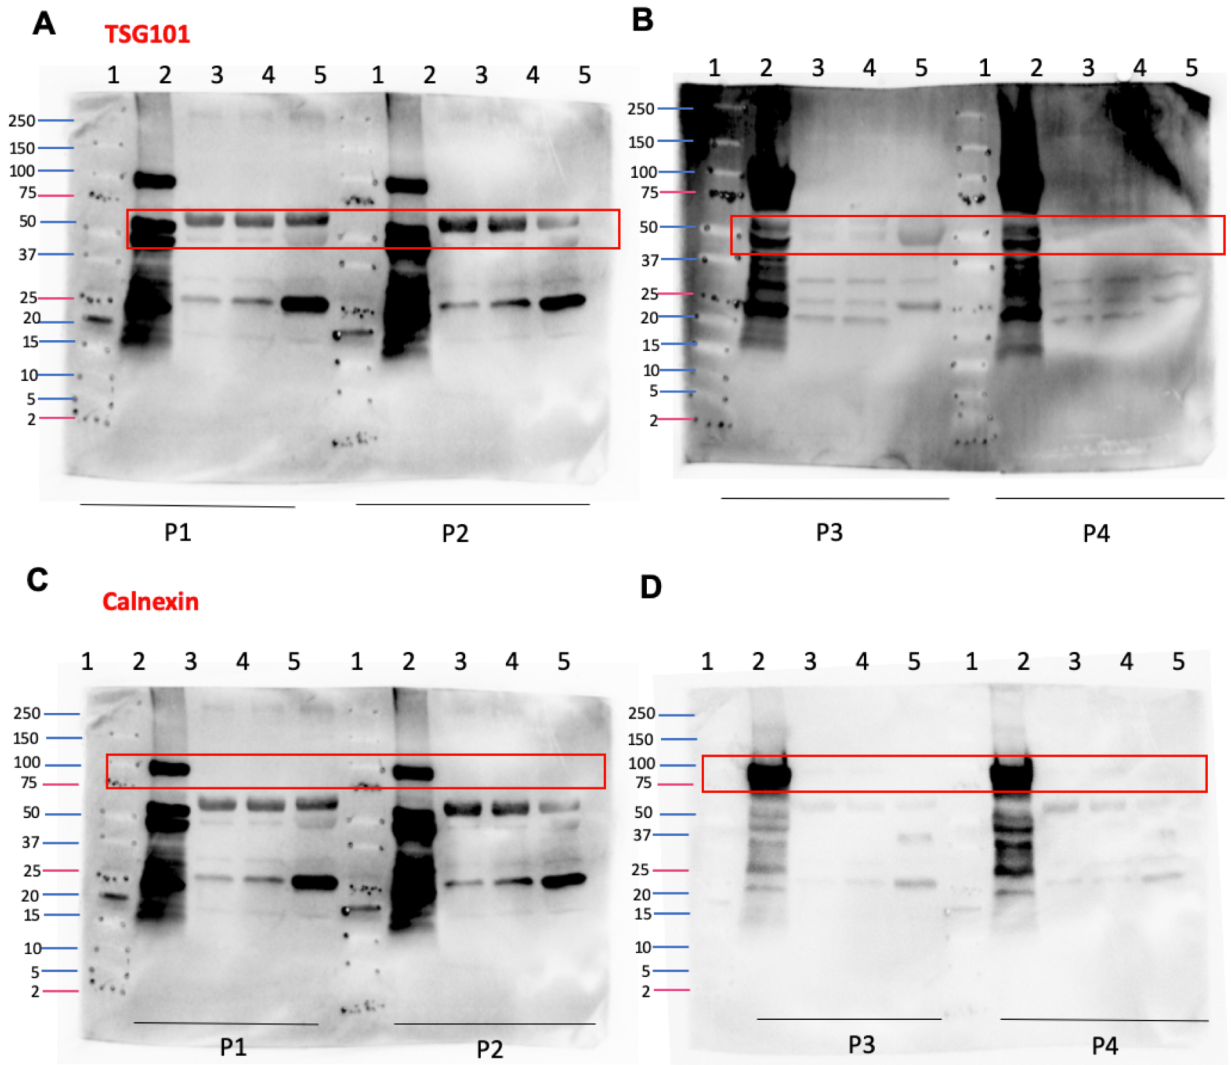

**Figure S4.** Full images of immunoblots the expression of EV-associated TSG101 (**A-B**) and (**A-B**) and ER marker Calnexin (**C-D**) on PVDF. Auto exposure, 35µg of lysed HLM or EV protein loaded to each well. Lane 1= MW marker, Lane 2=HLM, Lane 3=qEV35, Lane 4=qEV70, Lane5=ExoQuick.

TSG101 predicted band ~50kDa, observed double band at 48-55kDa  
 Calnexin 5 predicted band at ~90kDa, observed at ~95kDa

## Albumin in Serum vs EV lysates

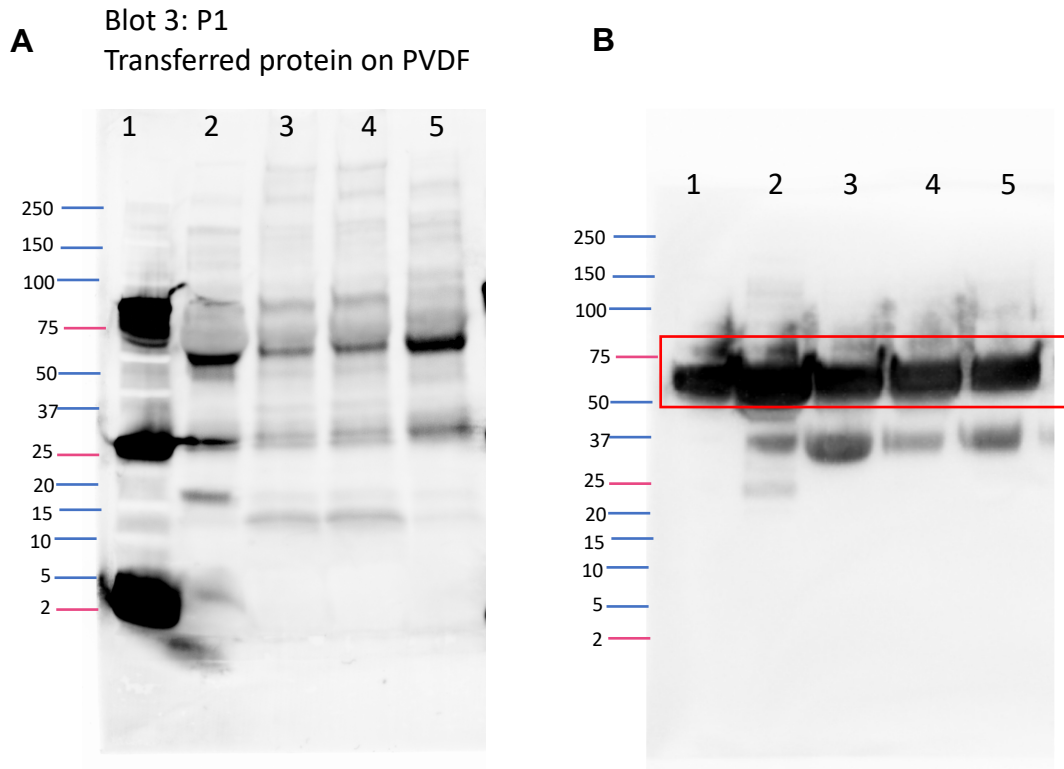

**Figure S5. (A)** Full images protein on PVDF/stain-free; **(B)** Full image of immunoblot showing Albumin expression at  $\sim 70$ kDa. Lane 1=MW marker, Lane 2=HLM, Lane 3=qEV35, Lane 4=qEV70, Lane5=ExoQuick.; Albumin protein leaked from Lane 2 into Lane 1, therefore, Lane 1 and Lane 2 are considered to be one well in terms of Albumin protein expression. EV protein and matched serum samples from P1 were used;  $35\mu\text{g}$  of lysed serum or lysed EV protein loaded to each well.

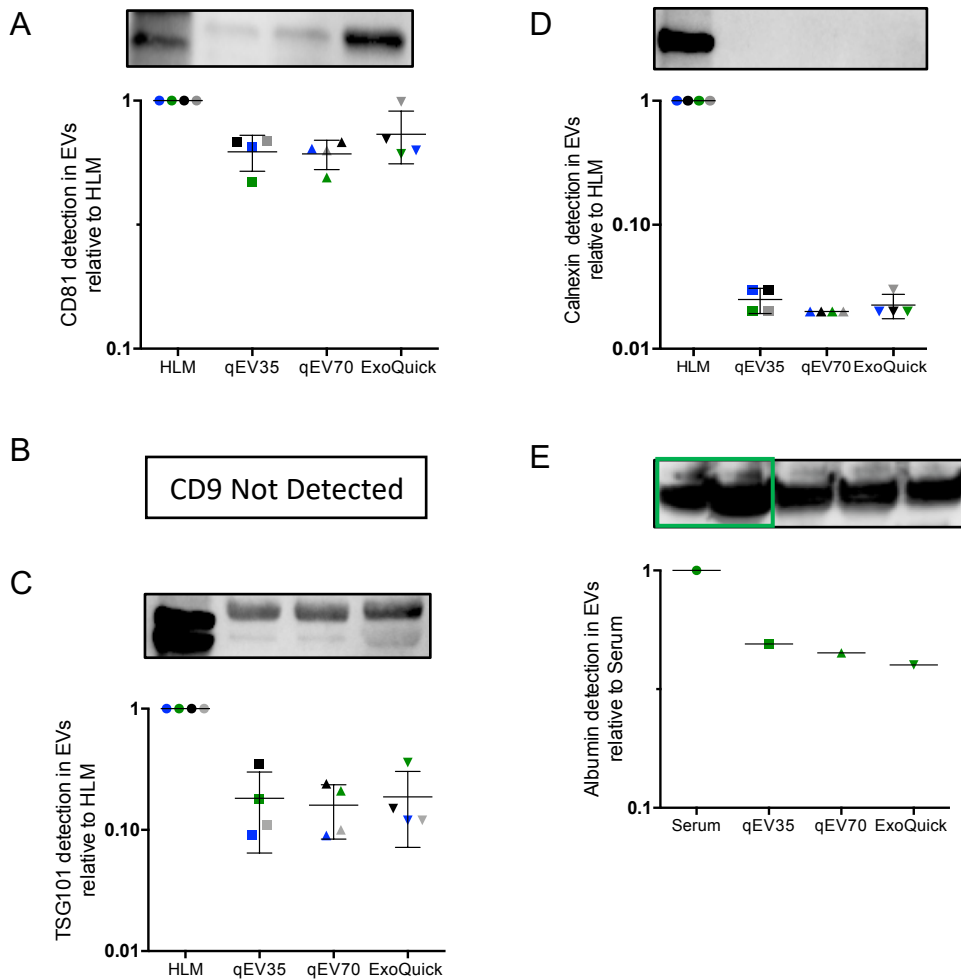

**Figure S6. Relative protein quantification by ImageJ.** ImageJ obtained values for non-EV controls (HLM) (A-D) and serum (E) were set to one and values obtained for corresponding EV lanes were expressed as fold change relative to non-EV control. The main focus was to compare protein expression between EVs obtained by three isolation methods, however, non-EV controls were included.

**Figure S7.** Representative chromatograms in Skyline. Stable isotope labelled peptides [ALB: 80 pmol/mL, CD81: 8 pmol/mL, CD9: 0.8 pmol/mL, CANX: 1.6 pmol/mL, TSG101: 1.6 pmol/mL] spiked into EV digests (qEV70) from healthy human serum.

Albumin

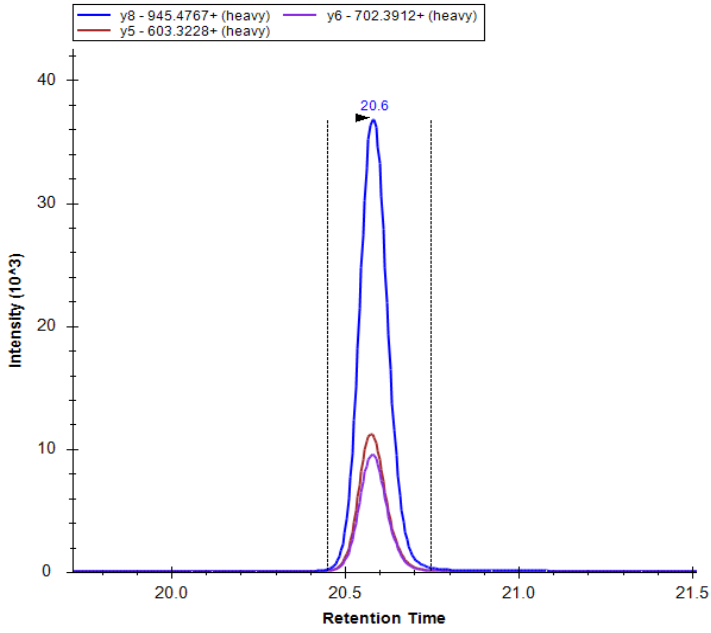

CD81

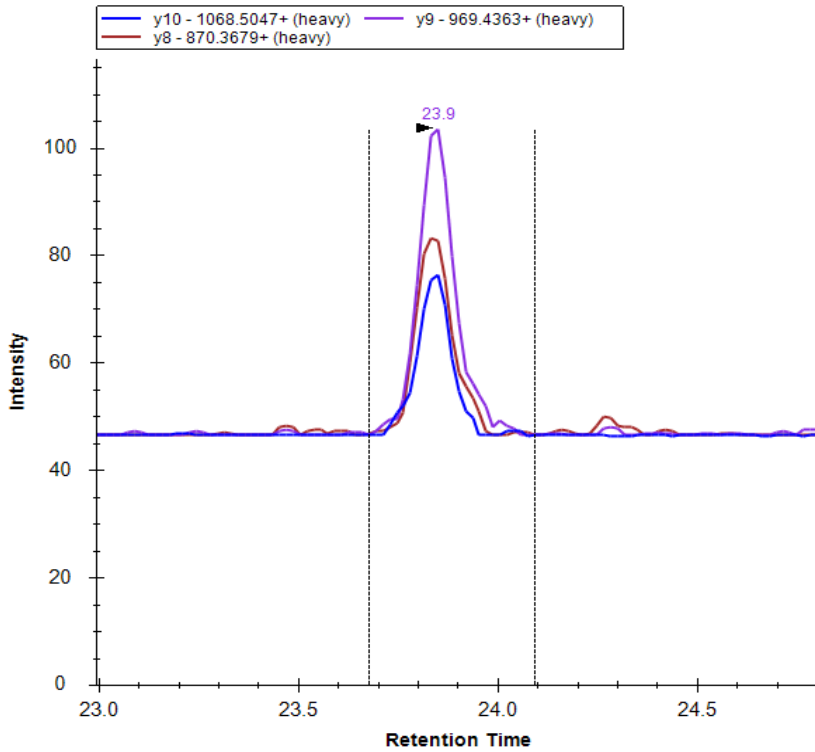

CD9

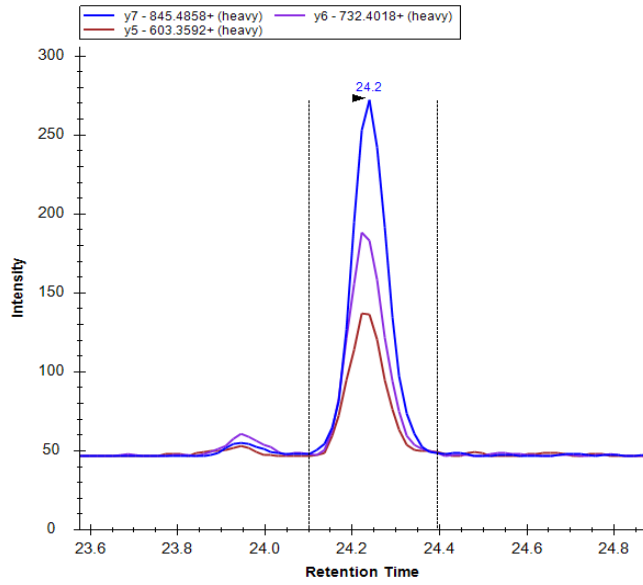

CANX

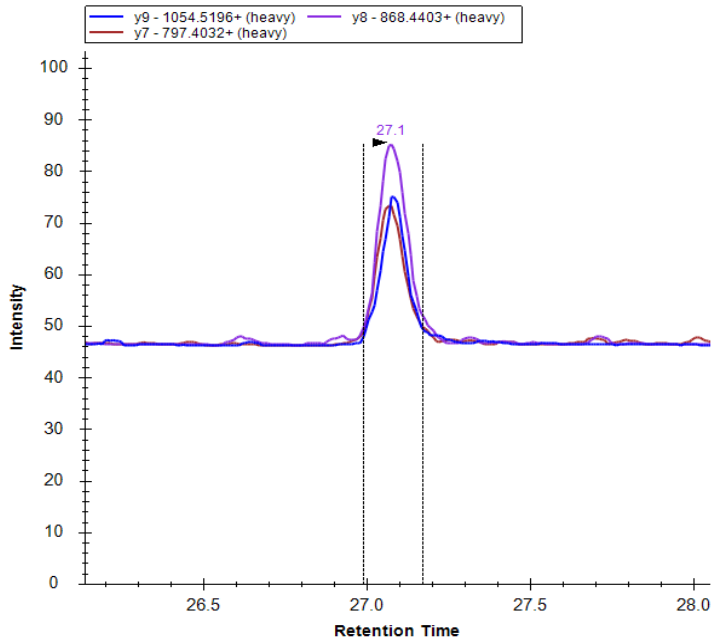

TSG101

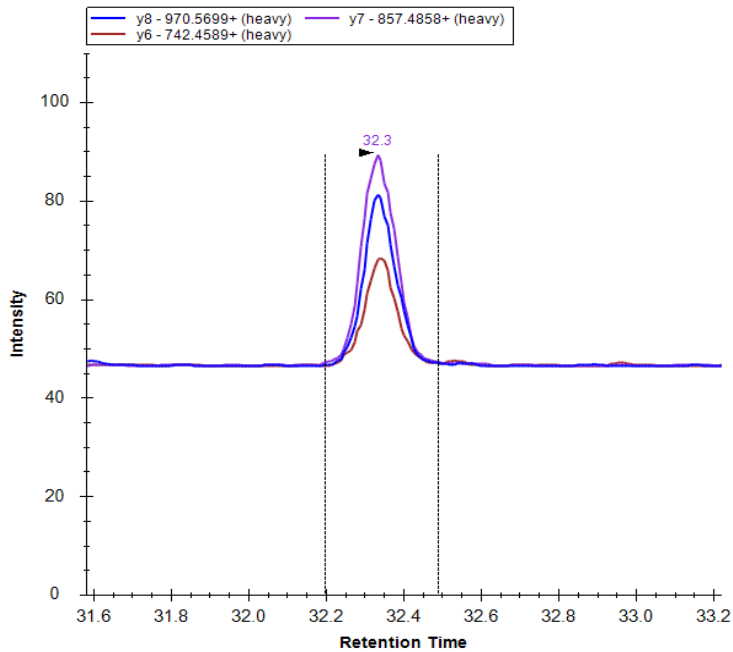

**Figure S8.** Comparison of sample consumption for immunoblots and LC-MS/MS injections in EV marker analytical workflow.

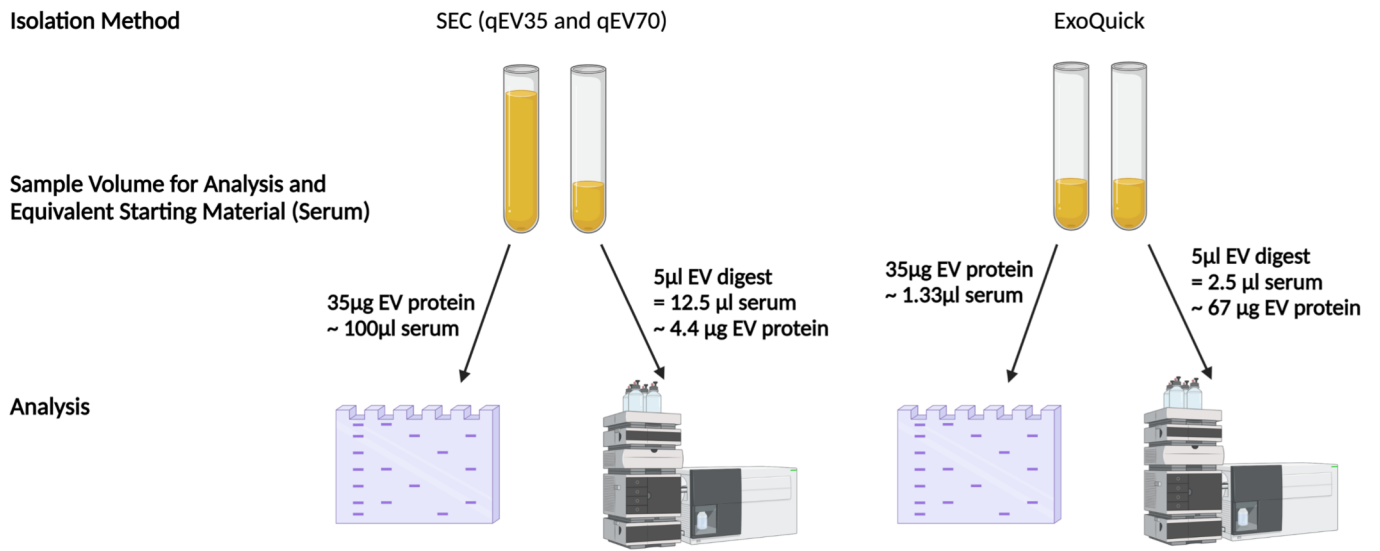

**Table S1.** Protein concentration of EV samples, measured by micro BCA, and comparison of sample consumptions for immunoblots and LC-MS/MS injections. Immunoblot protein loading = 35 µg. LC-MS/MS injection volume = 5 µl.

| Method   | Donor | Protein Concentration (µg/µl) | Immunoblots            |                              | LC-MS/MS                   |                              |
|----------|-------|-------------------------------|------------------------|------------------------------|----------------------------|------------------------------|
|          |       |                               | Volume EVs Loaded (µl) | Equivalent Serum Volume (µl) | Protein per Injection (µg) | Equivalent Serum Volume (µl) |
| qEV35    | 1     | 1.71                          | 20.4                   | 102.1                        | 4.28                       | 12.5                         |
|          | 2     | 1.68                          | 20.8                   | 104.2                        | 4.20                       |                              |
|          | 3     | 1.54                          | 22.7                   | 113.6                        | 3.85                       |                              |
|          | 4     | 1.41                          | 24.8                   | 124.1                        | 3.53                       |                              |
| qEV70    | 1     | 1.92                          | 18.2                   | 91.1                         | 4.80                       | 12.5                         |
|          | 2     | 1.67                          | 20.9                   | 104.7                        | 4.18                       |                              |
|          | 3     | 2.40                          | 14.6                   | 72.8                         | 6.00                       |                              |
|          | 4     | 1.85                          | 18.9                   | 94.6                         | 4.63                       |                              |
| ExoQuick | 1     | 139.27                        | 0.25                   | 1.26                         | 69.64                      | 2.5                          |
|          | 2     | 116.42                        | 0.30                   | 1.50                         | 58.21                      |                              |
|          | 3     | 113.22                        | 0.31                   | 1.55                         | 56.61                      |                              |
|          | 4     | 168.33                        | 0.21                   | 1.04                         | 84.17                      |                              |



**Table S2.** Detection of EV markers in serum and plasma EVs from healthy donors and patients with NAFLD using qEV70 and ExoQuick.

| Analyte       | qEV70 EVs > LOD (%)    |                         |                       | ExoQuick EVs > LOD (%) |                      |
|---------------|------------------------|-------------------------|-----------------------|------------------------|----------------------|
|               | Healthy Serum<br>(n=9) | Healthy Plasma<br>(n=5) | NAFLD Plasma<br>(n=4) | Healthy Serum<br>(n=9) | NAFLD Serum<br>(n=5) |
| <b>ALB</b>    | 100                    | 100                     | 100                   | 100                    | 100                  |
| <b>CD81</b>   | 78                     | 80                      | 100                   | 100                    | 100                  |
| <b>CD9</b>    | 100                    | 100                     | 100                   | 100                    | 100                  |
| <b>CANX</b>   | 100                    | 20                      | 80                    | 78                     | 100                  |
| <b>TSG101</b> | 89                     | 80                      | 100                   | 100                    | 100                  |
